# Supplementary material for: Highly efficient deep-red organic electrophosphorescent devices with excellent operational stability using bis(indoloquinoxalinyl) derivatives as the host materials
Source: Royal Society of Chemistry journal article supplement (doi:10.1039/c3tc30823e), 2013-01-01

## Supporting Information

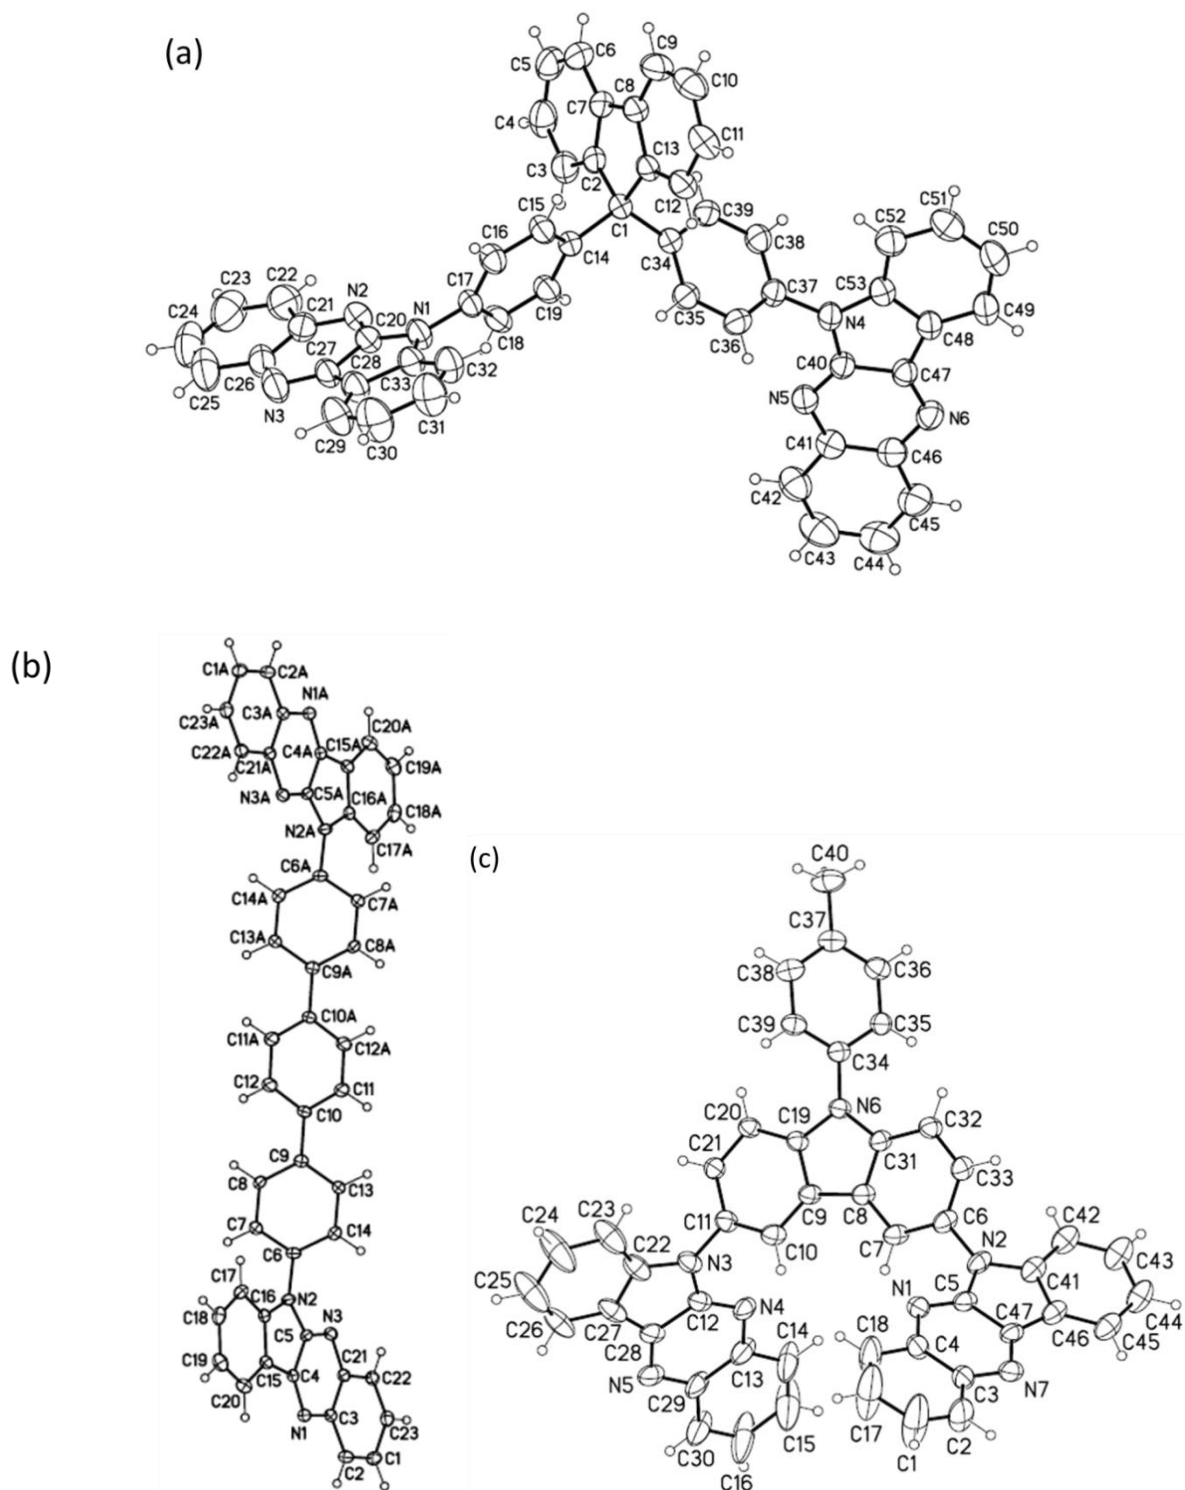

**Figure S1.** ORTEP drawings of (a)BIQF, (b)BIQTP and (c) BIQMCz with thermal ellipsoids shown at the 50% probability levels.

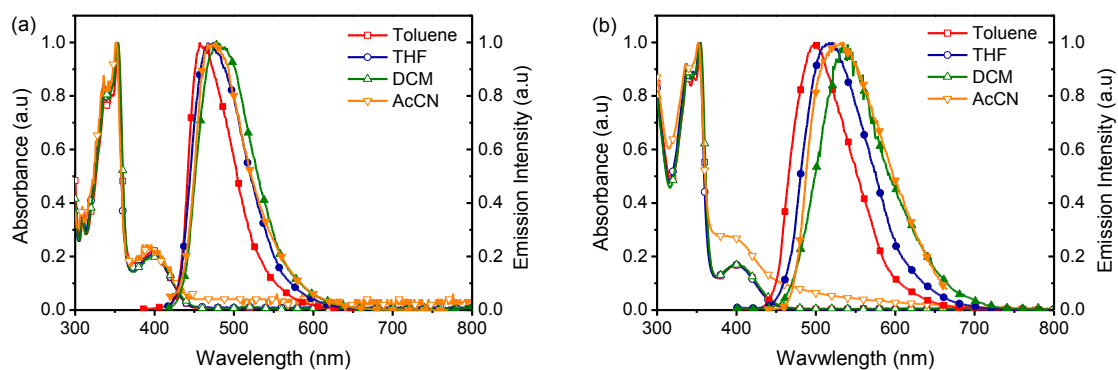

**Figure S2.** Optical spectra of (a) BIQF and (b) BIQMCz measured at room temperature in toluene, tetrahydrofuran, dichloromethane, and acetonitrile ( $10^{-5}$  M).

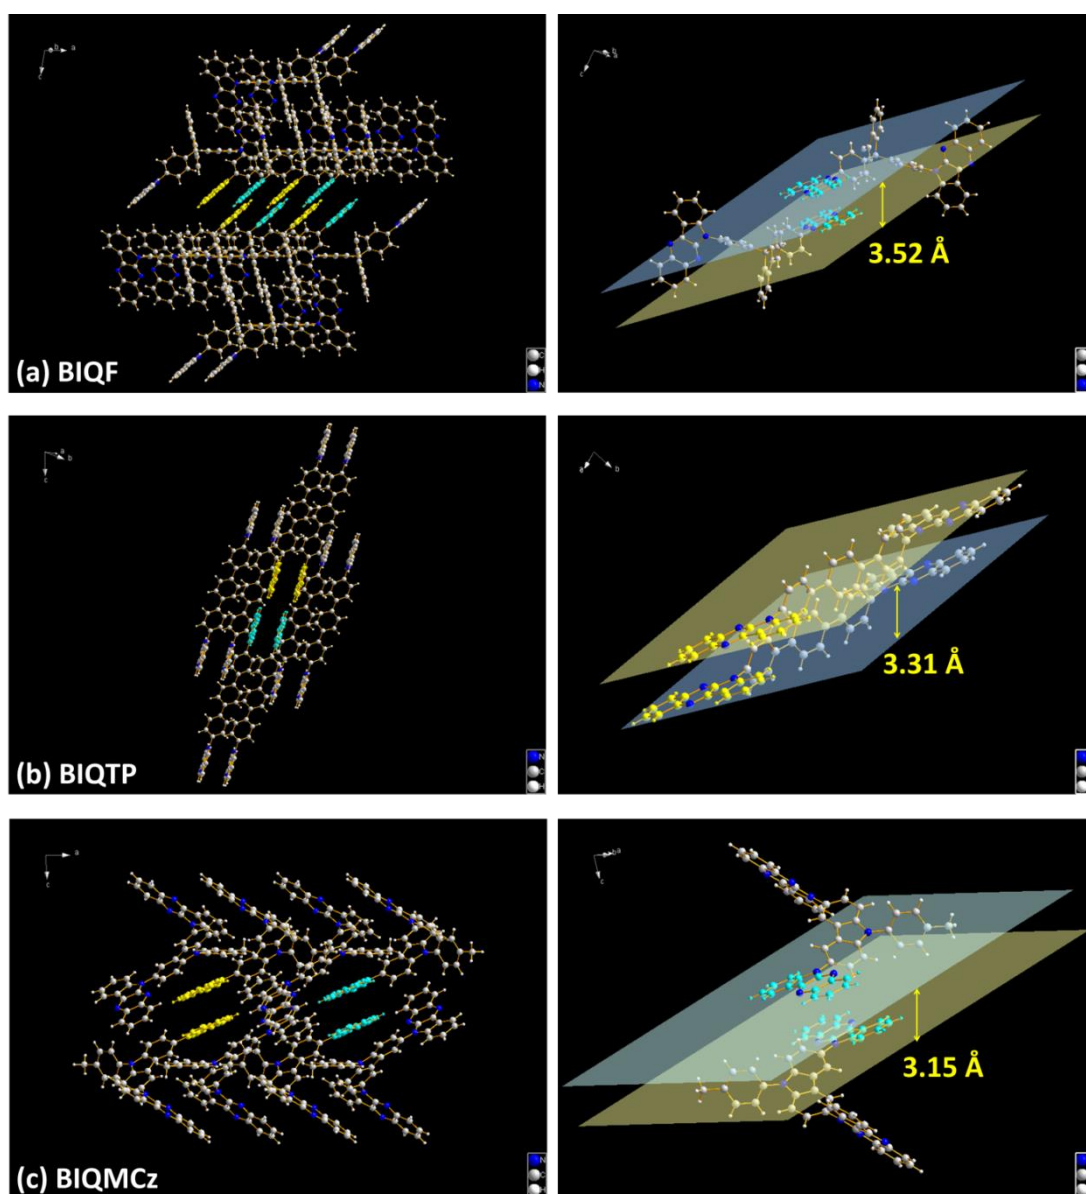

**Figure S3.** The molecular alignments (left, the offset stacking indoloquinoxaline moieties were depicted in the same color) and the distance between two neighboring indoloquinoxalines (right) in the crystal structure of (a) BIQF, (b) BIQTP and (c) BIQMCz.

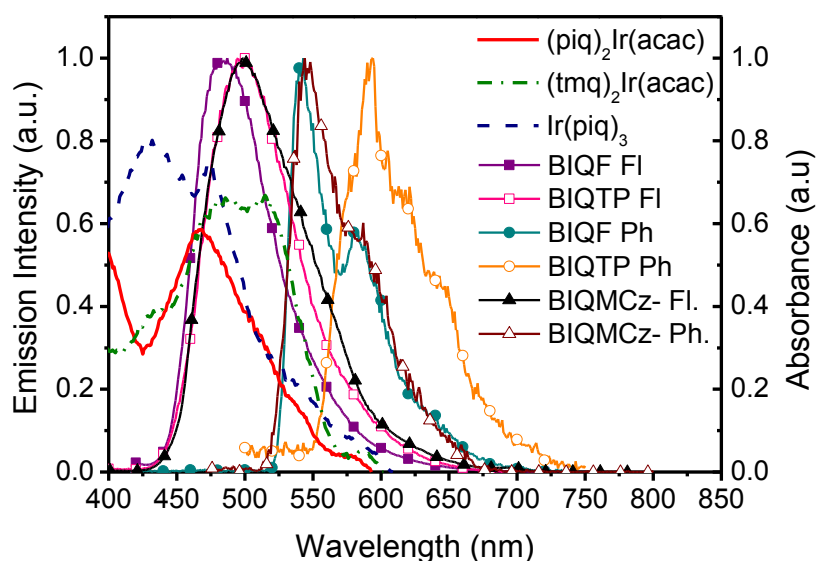

**Figure S4.** The fluorescence (Fl.) spectra and the phosphorescence (Ph.) spectrum of BIQF, BIQTP and BIQMCz films and excitation (intensity at 620 nm) spectra of  $\text{Ir}(\text{piq})_2(\text{acac})$ ,  $\text{Ir}(\text{piq})_3$  and  $\text{Ir}(\text{tmq})_2(\text{acac})$  measured at room temperature in dichloromethane ( $10^{-5}$  M).

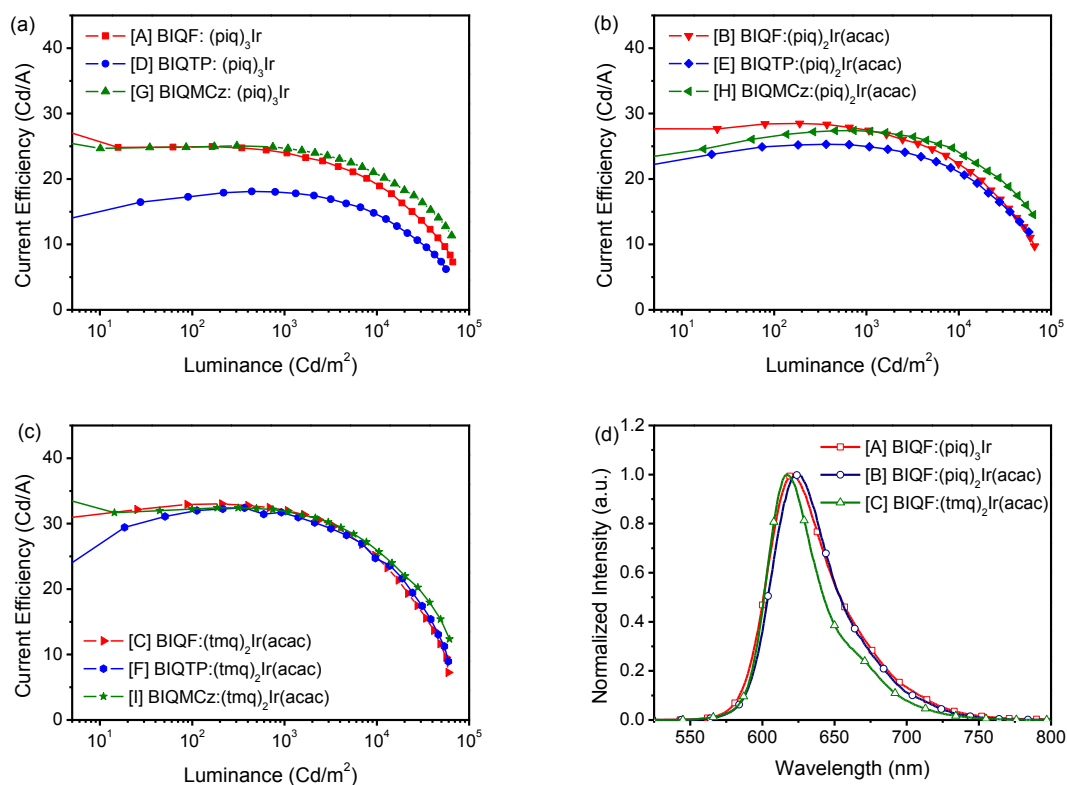

**Figure S5.** Current efficiency versus luminance for devices A–I, classified by dopants (a)  $\text{Ir}(\text{piq})_3$ , (b)  $\text{Ir}(\text{piq})_2(\text{acac})$  and (c)  $(\text{tmq})_2\text{Ir}(\text{acac})$ . (d) EL spectra of devices A, B and C.

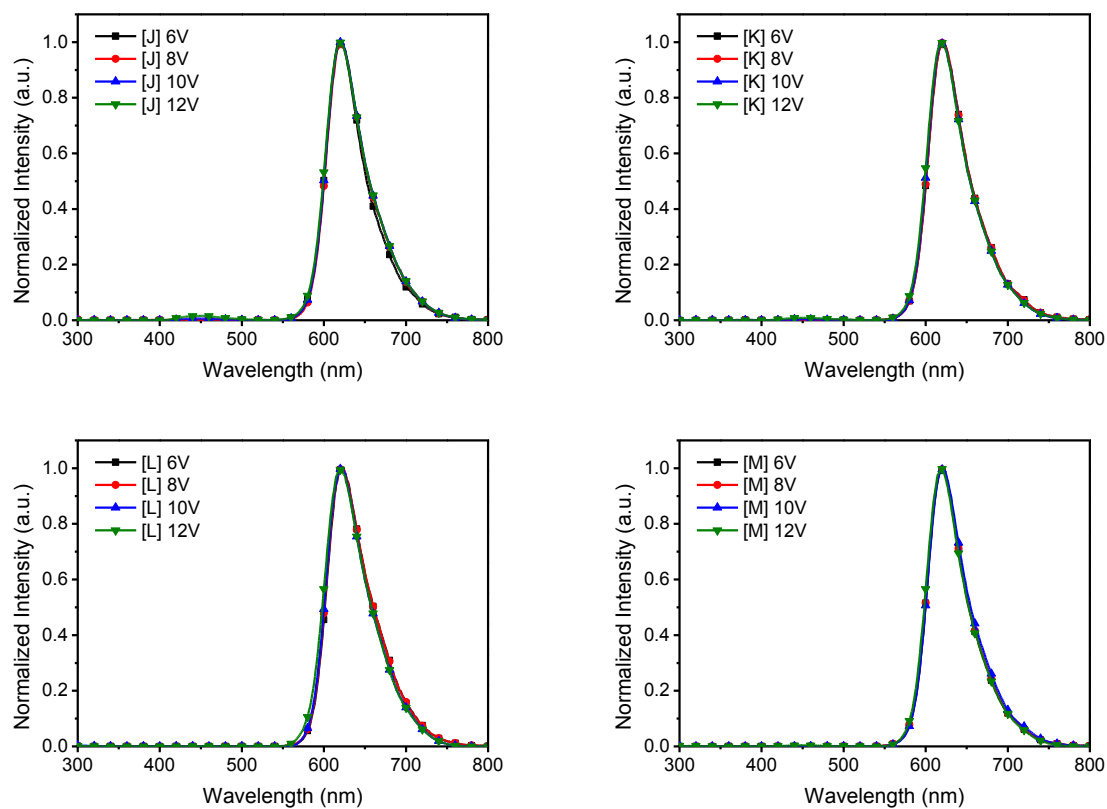

**Fig.S6** The electroluminescence spectra of Devices J, K, L and M at different applied voltages.

**Table S1.** Main excitation energies and electron contour plots of molecular orbitals of BIQF.

| BIQF                     |                                                          |                                  |                                        |                |
|--------------------------|----------------------------------------------------------|----------------------------------|----------------------------------------|----------------|
| transition               | most related orbitals                                    | $E_{\text{cal}}^{\text{a}}$ (eV) | $\lambda_{\text{cal}}^{\text{b}}$ (nm) | $f^{\text{c}}$ |
| $S_0 \rightarrow S_2$    | HOMO-1 $\rightarrow$ LUMO<br>HOMO $\rightarrow$ LUMO+1   | 3.0930                           | 400.85                                 | 0.0258         |
| $S_0 \rightarrow S_9$    | HOMO-4 $\rightarrow$ LUMO+1<br>HOMO-3 $\rightarrow$ LUMO | 3.8123                           | 325.22                                 | 0.2860         |
| $S_0 \rightarrow S_{10}$ | HOMO-4 $\rightarrow$ LUMO<br>HOMO-3 $\rightarrow$ LUMO+1 | 3.8206                           | 324.51                                 | 0.2283         |

a. Excitation energy; b. Excitation wavelength; c. Oscillator strength.

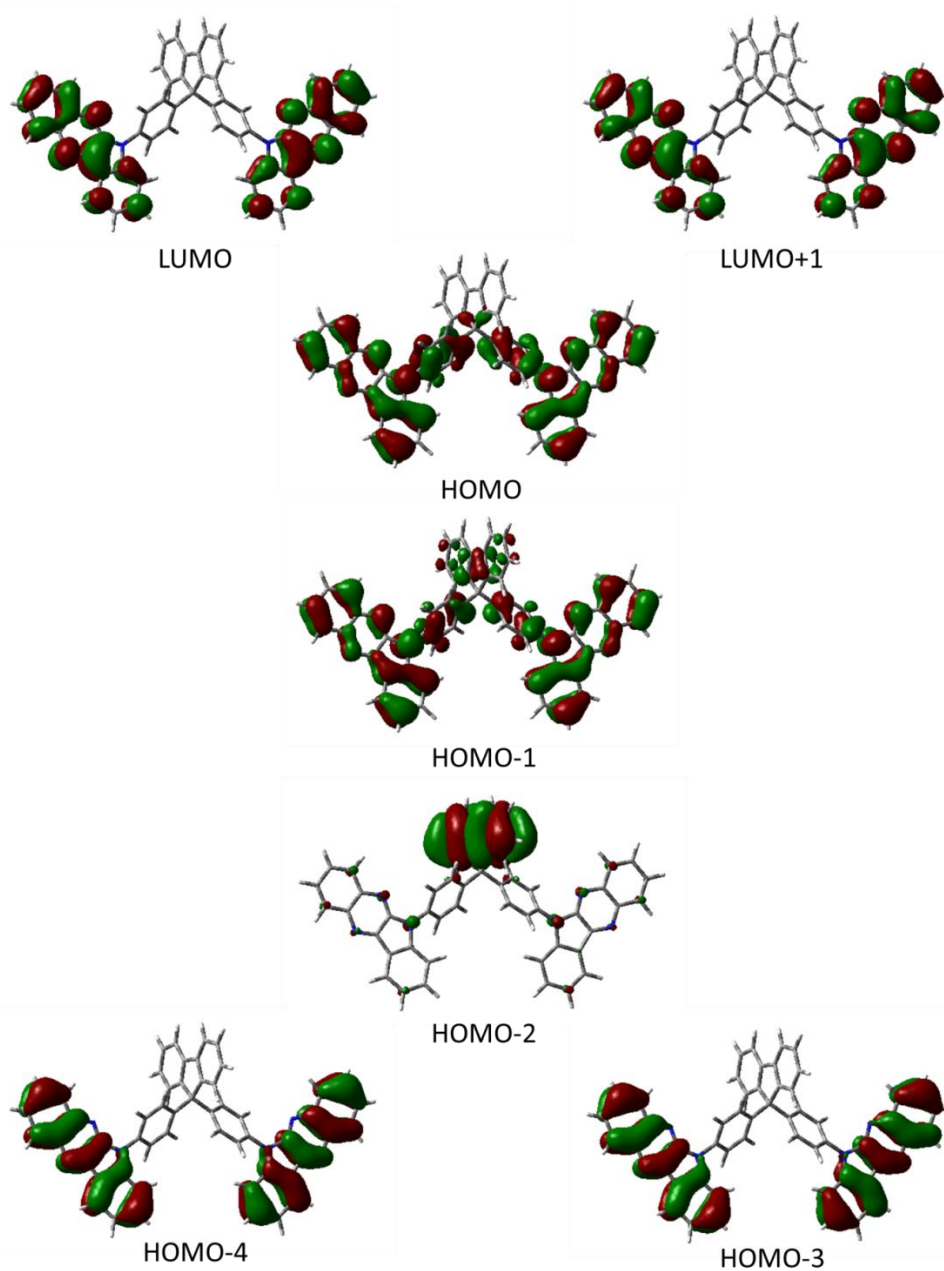

**Table S2.** Main excitation energies and electron contour plots of molecular orbitals of BIQTP.

| BIQTP                 |                                                        |                                  |                                        |                |
|-----------------------|--------------------------------------------------------|----------------------------------|----------------------------------------|----------------|
| transition            | most related orbitals                                  | $E_{\text{cal}}^{\text{a}}$ (eV) | $\lambda_{\text{cal}}^{\text{b}}$ (nm) | $f^{\text{c}}$ |
| $S_0 \rightarrow S_1$ | HOMO-1 $\rightarrow$ LUMO<br>HOMO $\rightarrow$ LUMO+1 | 3.0472                           | 406.88                                 | 0.0185         |
| $S_0 \rightarrow S_4$ | HOMO-1 $\rightarrow$ LUMO<br>HOMO $\rightarrow$ LUMO+1 | 3.4529                           | 359.08                                 | 0.0356         |

a. Excitation energy; b. Excitation wavelength; c. Oscillator strength.

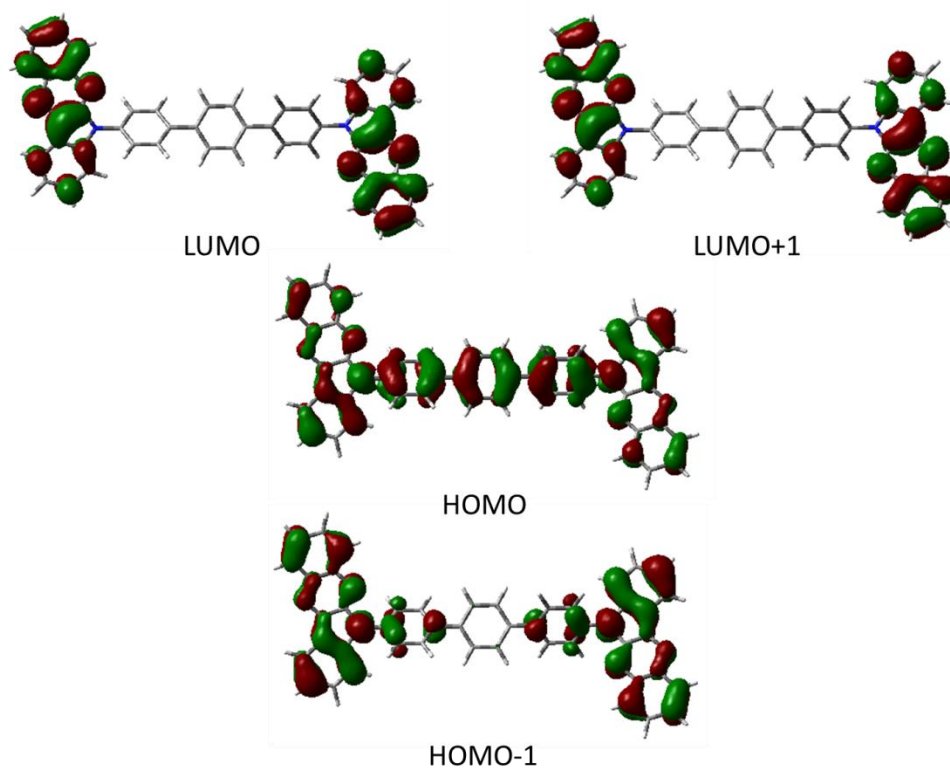



**Table S3.** Excitation energies and electron contour plots of molecular orbitals of BIQMCz.

| BIQMCz                |                                                          |                                  |                                        |                |
|-----------------------|----------------------------------------------------------|----------------------------------|----------------------------------------|----------------|
| transition            | most related orbitals                                    | $E_{\text{cal}}^{\text{a}}$ (eV) | $\lambda_{\text{cal}}^{\text{b}}$ (nm) | $f^{\text{c}}$ |
| $S_0 \rightarrow S_1$ | HOMO $\rightarrow$ LUMO                                  | 2.9611                           | 418.71                                 | 0.0112         |
| $S_0 \rightarrow S_2$ | HOMO $\rightarrow$ LUMO+1                                | 2.9623                           | 418.54                                 | 0.0089         |
| $S_0 \rightarrow S_8$ | HOMO-2 $\rightarrow$ LUMO<br>HOMO-3 $\rightarrow$ LUMO+1 | 3.7473                           | 330.86                                 | 0.1230         |

a. Excitation energy; b. Excitation wavelength; c. Oscillator strength.

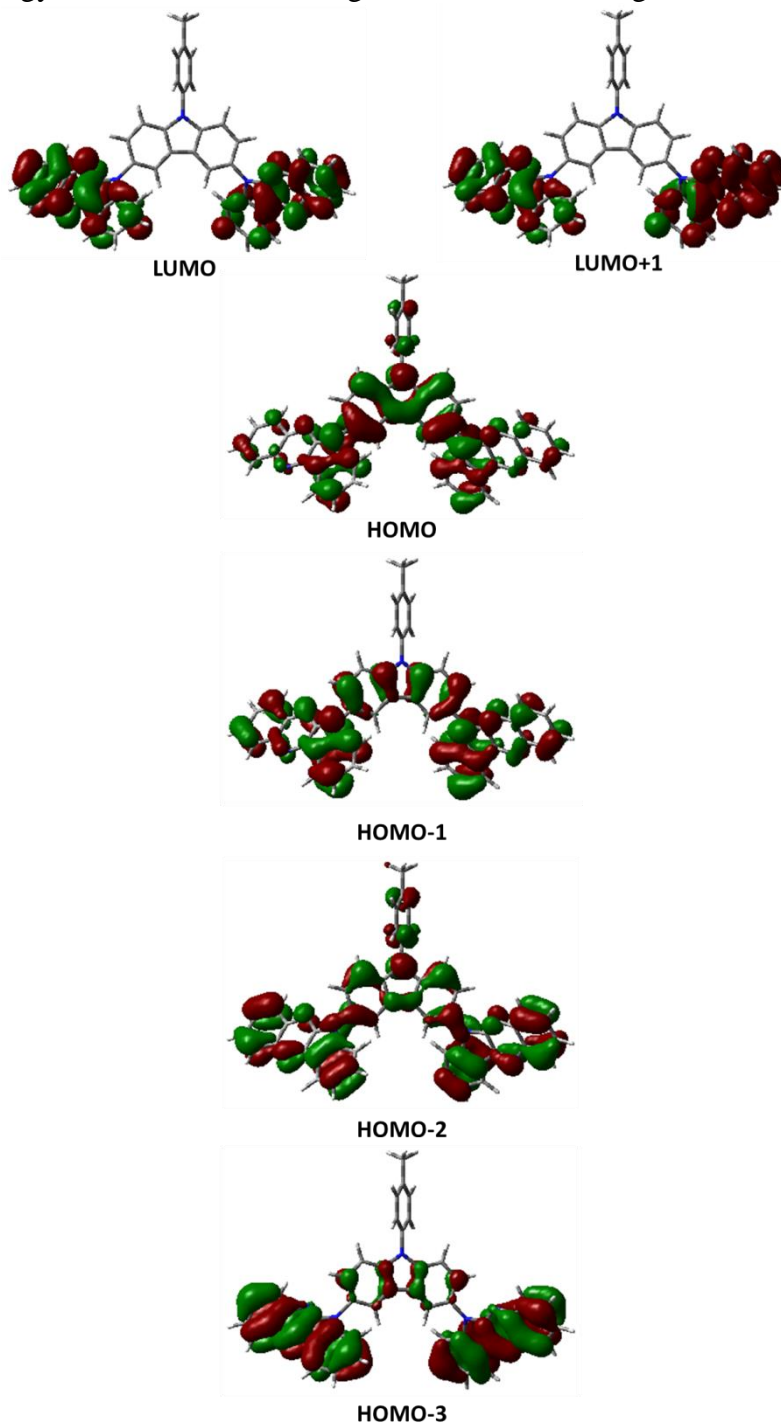

Supplement: c3tc30823e.pdf [file c3tc30823e.pdf]
